# Supplementary material for: Non-invasive molecular imaging of inflammatory macrophages in allograft rejection
Source: Springer Nature journal article supplement (doi:10.1186/s13550-015-0146-7), 2015-11-26
Supplement: MOESM1 [file 9786440]

# ESM Figure 1

Alexander S. G. O'Neill<sup>1,2</sup>, Samantha Y.A. Terry<sup>1</sup>, Kathryn Brown<sup>3</sup>, Lucy Meader<sup>3</sup>, Andrew M.S. Wong<sup>4</sup>, Jonathan D. Cooper<sup>4</sup>, Paul R. Crocker<sup>4,5</sup>, Wilson Wong<sup>3</sup>, Gregory E. D. Mullen<sup>1,3\*</sup>

<sup>1</sup>Department of Imaging Chemistry and Biology, Division of Imaging Sciences and Biomedical Engineering, King's College London, St. Thomas' Hospital, London, SE1 7EH, UK

<sup>2</sup>Division of Medical Sciences, University of Oxford, John Radcliffe Hospital, Oxford, OX3 9DU

<sup>3</sup>MRC Centre for Transplantation, King's College London, Guy's Hospital, London, UK

<sup>4</sup>Pediatric Storage Disorders Laboratory, Department of Neuroscience and Centre for the Cellular Basis of Behaviour, King's College London, London, UK

<sup>5</sup>Division of Cell Signalling and Immunology, College of Life Sciences, University of Dundee, Dundee, UK

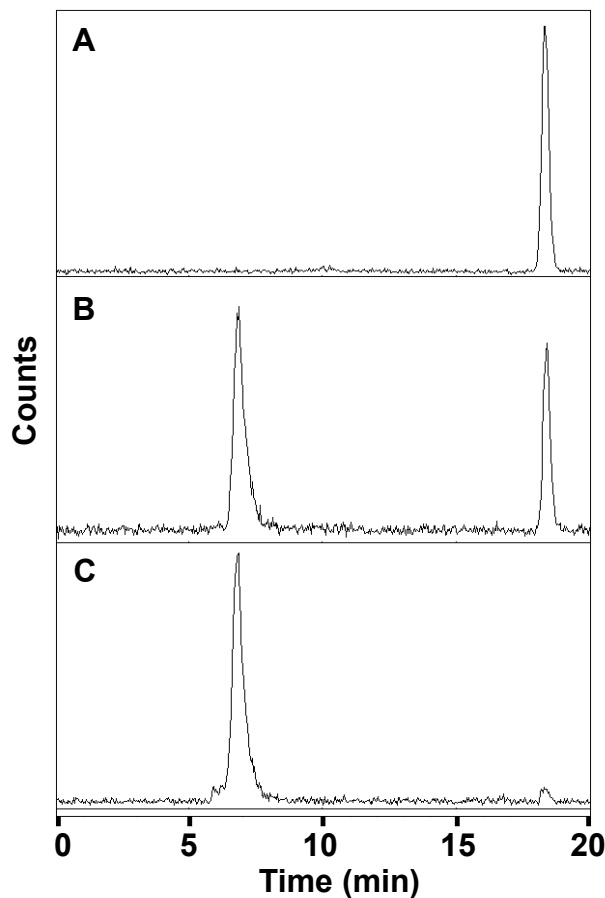

## SUPPLEMENTAL FIGURE 1

Serum stability of <sup>99m</sup>Tc-SER-4. <sup>99m</sup>Tc-SER-4 was incubated in the presence of phosphate-buffered saline (B) or serum (C) for 20 hr at 37°C then injected into SEC radioHPLC system. Percentage bound was assessed by comparison of bound activity (integral of 8 min 25 sec peak) to that of free activity (integral of 17 min 45 sec peak). <sup>99m</sup>TcO<sub>4</sub> is included as a control (A).
