# Supplementary material for: Non-invasive molecular imaging of inflammatory macrophages in allograft rejection
Source: Springer Nature journal article supplement (doi:10.1186/s13550-015-0146-7), 2015-11-26
Supplement: MOESM2 [file 9786440]

## ESM Figure 2

Alexander S. G. O'Neill<sup>1,2</sup>, Samantha Y.A. Terry<sup>1</sup>, Kathryn Brown<sup>3</sup>, Lucy Meader<sup>3</sup>, Andrew M.S. Wong<sup>4</sup>, Jonathan D. Cooper<sup>4</sup>, Paul R. Crocker<sup>4,5</sup>, Wilson Wong<sup>3</sup>, Gregory E. D. Mullen<sup>1,3\*</sup>

<sup>1</sup>Department of Imaging Chemistry and Biology, Division of Imaging Sciences and Biomedical Engineering, King's College London, St. Thomas' Hospital, London, SE1 7EH, UK

<sup>2</sup>Division of Medical Sciences, University of Oxford, John Radcliffe Hospital, Oxford, OX3 9DU

<sup>3</sup>MRC Centre for Transplantation, King's College London, Guy's Hospital, London, UK

<sup>4</sup>Pediatric Storage Disorders Laboratory, Department of Neuroscience and Centre for the Cellular Basis of Behaviour, King's College London, London, UK

<sup>5</sup>Division of Cell Signalling and Immunology, College of Life Sciences, University of Dundee, Dundee, UK

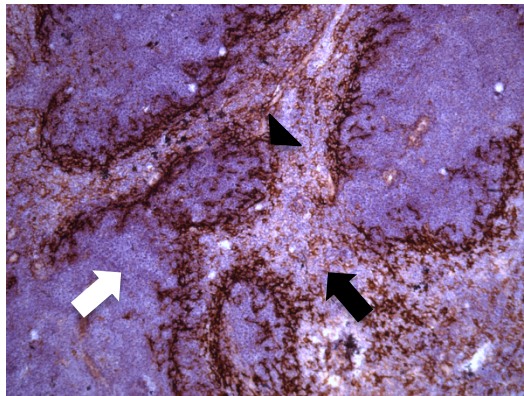

### SUPPLEMENTAL FIGURE 2

Spleen sections from with type animals stained with SER-4 and counterstained with haematoxylin. White arrow denotes white pulp, black arrow denotes red pulp, black arrowhead denotes marginal metallophilic macrophages.
