# Supplementary material for: Non-invasive molecular imaging of inflammatory macrophages in allograft rejection
Source: Springer Nature journal article supplement (doi:10.1186/s13550-015-0146-7), 2015-11-26
Supplement: MOESM3 [file 9786440]

# ESM Table 1

Alexander S. G. O'Neill<sup>1,2</sup>, Samantha Y.A. Terry<sup>1</sup>, Kathryn Brown<sup>3</sup>, Lucy Meader<sup>3</sup>, Andrew M.S. Wong<sup>4</sup>, Jonathan D. Cooper<sup>4</sup>, Paul R. Crocker<sup>4,5</sup>, Wilson Wong<sup>3</sup>, Gregory E. D. Mullen<sup>1,3\*</sup>

<sup>1</sup>Department of Imaging Chemistry and Biology, Division of Imaging Sciences and Biomedical Engineering, King's College London, St. Thomas' Hospital, London, SE1 7EH, UK

<sup>2</sup>Division of Medical Sciences, University of Oxford, John Radcliffe Hospital, Oxford, OX3 9DU

<sup>3</sup>MRC Centre for Transplantation, King's College London, Guy's Hospital, London, UK

<sup>4</sup>Pediatric Storage Disorders Laboratory, Department of Neuroscience and Centre for the Cellular Basis of Behaviour, King's College London, London, UK

<sup>5</sup>Division of Cell Signalling and Immunology, College of Life Sciences, University of Dundee, Dundee, UK

| Mouse      | 1 hr   |        |        | 3 hr   |        |        | 6 hr   |        |        |
|------------|--------|--------|--------|--------|--------|--------|--------|--------|--------|
|            | 1      | 2      | 3      | 4      | 5      | 6      | 7      | 8      | 9      |
| intestines | 7.14   | 6.35   | 9.07   | 2.99   | 3.36   | 3.53   | 7.37   | 5.61   | 6.41   |
| stomach    | 4.24   | 2.98   | 3.68   | 4.59   | 7.80   | 5.24   | 6.77   | 5.83   | 7.77   |
| spleen     | 352.21 | 257.18 | 330.21 | 379.54 | 347.95 | 378.69 | 390.33 | 290.06 | 268.75 |
| liver      | 100.42 | 95.52  | 66.07  | 116.28 | 141.65 | 135.89 | 93.38  | 95.13  | 113.52 |
| kidney     | 21.94  | 21.02  | 20.77  | 12.38  | 16.73  | 13.96  | 20.82  | 15.31  | 19.87  |
| heart      | 2.31   | 2.57   | 2.26   | 11.04  | 9.28   | 9.91   | 7.80   | 7.72   | 9.60   |
| lungs      | 8.94   | 7.65   | 6.55   | 7.27   | 10.25  | 8.85   | 7.70   | 4.93   | 5.75   |
| blood      | 39.23  | 37.74  | 39.76  | 25.35  | 27.66  | 21.19  | 15.23  | 13.11  | 16.73  |
| muscle     | 0.84   | 1.27   | 0.69   | 0.72   | 1.02   | 0.75   | 0.58   | 1.36   | 0.73   |
| bone       | 16.41  | 21.89  | 28.16  | 24.21  | 19.56  | 21.44  | 25.95  | 23.85  | 29.51  |

**ESM Table 1. Timecourse biodistribution of <sup>99m</sup>Tc-SER-4 in wild type mice.** Biodistribution of <sup>99m</sup>Tc-SER-4 in wild type mice at 1 hr, 3 hr and 6 hr post injection. Data expressed as percentage injected dose per gram of tissue (%ID/g)
