# Supplementary material for: Non-invasive molecular imaging of inflammatory macrophages in allograft rejection
Source: Springer Nature journal article supplement (doi:10.1186/s13550-015-0146-7), 2015-11-26
Supplement: MOESM4 [file 9786440]

## ESM Table 2

Alexander S. G. O'Neill<sup>1,2</sup>, Samantha Y.A. Terry<sup>1</sup>, Kathryn Brown<sup>3</sup>, Lucy Meader<sup>3</sup>, Andrew M.S. Wong<sup>4</sup>, Jonathan D. Cooper<sup>4</sup>, Paul R. Crocker<sup>4,5</sup>, Wilson Wong<sup>3</sup>, Gregory E. D. Mullen<sup>1,3\*</sup>

<sup>1</sup>Department of Imaging Chemistry and Biology, Division of Imaging Sciences and Biomedical Engineering, King's College London, St. Thomas' Hospital, London, SE1 7EH, UK

<sup>2</sup>Division of Medical Sciences, University of Oxford, John Radcliffe Hospital, Oxford, OX3 9DU

<sup>3</sup>MRC Centre for Transplantation, King's College London, Guy's Hospital, London, UK

<sup>4</sup>Pediatric Storage Disorders Laboratory, Department of Neuroscience and Centre for the Cellular Basis of Behaviour, King's College London, London, UK

<sup>5</sup>Division of Cell Signalling and Immunology, College of Life Sciences, University of Dundee, Dundee, UK

|            | WT x isotype |       |       |       |       | WT x SER4 |        |        |        |        | Sn KO x SER4 |       |       |       |       |  |
|------------|--------------|-------|-------|-------|-------|-----------|--------|--------|--------|--------|--------------|-------|-------|-------|-------|--|
|            | 1.00         | 2.00  | 3.00  | 4.00  | 5.00  | 6.00      | 7.00   | 8.00   | 9.00   | 10.00  | 11.00        | 12.00 | 13.00 | 14.00 | 15.00 |  |
| Mouse      | 1.00         | 2.00  | 3.00  | 4.00  | 5.00  | 6.00      | 7.00   | 8.00   | 9.00   | 10.00  | 11.00        | 12.00 | 13.00 | 14.00 | 15.00 |  |
| intestines | 7.19         | 7.98  | 8.19  | 7.16  | 7.80  | 18.07     | 13.74  | 9.24   | 14.00  | 9.62   | 3.70         | 5.75  | 4.40  | 4.81  | 6.28  |  |
| stomach    | 6.75         | 3.59  | 5.27  | 4.20  | 6.61  | 6.15      | 5.95   | 7.78   | 9.60   | 6.13   | 6.26         | 4.38  | 3.32  | 4.70  | 5.83  |  |
| spleen     | 20.38        | 17.32 | 16.00 | 15.83 | 13.14 | 253.55    | 265.69 | 143.74 | 246.20 | 127.80 | 8.16         | 7.62  | 7.69  | 7.63  | 10.23 |  |
| liver      | 24.57        | 27.74 | 24.73 | 22.06 | 32.70 | 41.76     | 48.49  | 30.01  | 39.50  | 32.22  | 8.87         | 10.56 | 8.42  | 12.18 | 10.03 |  |
| kidney     | 29.58        | 34.86 | 35.76 | 30.99 | 32.07 | 30.98     | 21.51  | 25.85  | 24.86  | 26.32  | 13.95        | 20.40 | 15.76 | 22.45 | 18.31 |  |
| heart      | 37.07        | 27.31 | 27.51 | 23.42 | 24.04 | 18.73     | 8.71   | 13.52  | 17.46  | 14.61  | 9.18         | 11.64 | 8.22  | 10.65 | 10.35 |  |
| blood      | 49.08        | 57.35 | 42.98 | 54.51 | 60.67 | 30.53     | 19.41  | 27.59  | 31.28  | 21.49  | 26.54        | 36.42 | 29.29 | 49.31 | 25.87 |  |
| lungs      | 28.98        | 29.34 | 29.39 | 27.16 | 25.79 | 17.06     | 8.76   | 17.49  | 11.44  | 13.23  | 16.22        | 17.64 | 14.66 | 15.46 | 16.61 |  |
| muscle     | 3.60         | 4.31  | 3.57  | 3.31  | 2.74  | 12.98     | 1.28   | 1.54   | 1.67   | 1.87   | 2.21         | 3.14  | 2.37  | 2.19  | 2.74  |  |
| bone       | 8.77         | 9.46  | 10.24 | 8.86  | 8.44  | 24.14     | 59.61  | 34.93  | 38.09  | 46.78  | 4.28         | 3.55  | 4.61  | 4.68  | 4.90  |  |

**ESM Table 2. Biodistribution of <sup>99m</sup>Tc-IgG and <sup>99m</sup>Tc-SER-4 in C57Bl/6 wild type (WT) and Sn<sup>-/-</sup> (KO) mice.** Biodistribution of <sup>99m</sup>Tc-IgG isotype control in C57Bl/6 wild type mice (WT x Isotype) <sup>99m</sup>Tc-SER-4 in C57Bl/6 wild type (WT x <sup>99m</sup>Tc-SER4) and Sn<sup>-/-</sup> mice (Sn KO x <sup>99m</sup>TcSER4) were expressed as percentage injected dose per gram of tissue (%ID/g).
