# Supplementary material for: Non-invasive molecular imaging of inflammatory macrophages in allograft rejection
Source: Springer Nature journal article supplement (doi:10.1186/s13550-015-0146-7), 2015-11-26
Supplement: MOESM5 [file 9786440]

## ESM Table 3

Alexander S. G. O'Neill<sup>1,2</sup>, Samantha Y.A. Terry<sup>1</sup>, Kathryn Brown<sup>3</sup>, Lucy Meader<sup>3</sup>, Andrew M.S. Wong<sup>4</sup>, Jonathan D. Cooper<sup>4</sup>, Paul R. Crocker<sup>4,5</sup>, Wilson Wong<sup>3</sup>, Gregory E. D. Mullen<sup>1,3\*</sup>

<sup>1</sup>Department of Imaging Chemistry and Biology, Division of Imaging Sciences and Biomedical Engineering, King's College London, St. Thomas' Hospital, London, SE1 7EH, UK

<sup>2</sup>Division of Medical Sciences, University of Oxford, John Radcliffe Hospital, Oxford, OX3 9DU

<sup>3</sup>MRC Centre for Transplantation, King's College London, Guy's Hospital, London, UK

<sup>4</sup>Pediatric Storage Disorders Laboratory, Department of Neuroscience and Centre for the Cellular Basis of Behaviour, King's College London, London, UK

<sup>5</sup>Division of Cell Signalling and Immunology, College of Life Sciences, University of Dundee, Dundee, UK

| Mouse        | Allogeneic x SER4 |       |       |       | Syngeneic x SER4 |       |       |        | Allogeneic x isotype |       |       |       |       |       |
|--------------|-------------------|-------|-------|-------|------------------|-------|-------|--------|----------------------|-------|-------|-------|-------|-------|
|              | 1                 | 2     | 3     | 4     | 5                | 6     | 7     | 8      | 9                    | 10    | 11    | 12    | 13    | 14    |
| intestines   | 2.37              | 3.10  | 2.93  | 1.87  | 3.21             | 6.30  | 5.20  | 6.48   | 8.07                 | 9.59  | 10.69 | 7.82  | 6.94  | 5.55  |
| stomach      | 2.18              | 3.31  | 2.12  | 2.38  | 3.52             | 3.98  | 2.97  | 3.80   | 7.62                 | 4.81  | 4.16  | 5.25  | 5.98  | 4.95  |
| spleen       | 48.01             | 47.32 | 50.14 | 52.31 | 66.78            | 72.15 | 85.26 | 128.98 | 113.47               | 8.68  | 7.98  | 9.26  | 8.46  | 7.77  |
| liver        | 22.66             | 22.96 | 28.02 | 24.36 | 33.87            | 18.13 | 18.92 | 26.63  | 36.57                | 15.17 | 12.09 | 13.74 | 13.53 | 12.00 |
| kidney       | 9.23              | 10.83 | 14.54 | 8.49  | 12.15            | 15.43 | 14.59 | 13.35  | 18.92                | 20.54 | 18.11 | 20.27 | 19.02 | 18.28 |
| heart graft  | 7.70              | 8.83  | 7.21  | 9.37  | 14.10            | 4.57  | 4.20  | 4.59   | 3.99                 | 4.99  | 6.03  | 5.90  | 6.38  | 6.38  |
| heart native | 2.35              | 2.84  | 2.51  | 2.91  | 5.42             | 3.99  | 4.28  | 11.74  | 20.51                | 14.26 | 15.75 | 17.39 | 18.60 | 15.05 |
| lungs        | 2.46              | 3.10  | 2.58  | 3.10  | 3.73             | 4.83  | 4.00  | 4.18   | 5.90                 | 11.95 | 10.53 | 11.94 | 13.03 | 9.65  |
| blood        | 5.38              | 6.51  | 6.96  | 4.90  | 8.31             | 12.63 | 10.54 | 13.62  | 15.88                | 53.34 | 51.21 | 47.53 | 49.86 | 49.42 |
| muscle       | 0.48              | 0.78  | 0.83  | 1.12  | 1.40             | 1.34  | 1.09  | 1.71   | 2.82                 | 2.35  | 2.00  | 1.55  | 2.64  | 3.04  |
| bone         | 18.00             | 19.54 | 23.23 | 10.41 | 28.53            | 23.11 | 28.71 | 23.02  | 24.87                | 5.78  | 7.94  | 6.55  | 4.55  | 4.76  |

### ESM Table 3. Biodistribution of <sup>99m</sup>Tc-SER-4 in heterotopic cardiac transplant model.

Biodistribution of <sup>99m</sup>Tc-SER-4 in recipients of allogeneic heart graft (mouse 1 – 5), syngeneic heart grafts (mouse 6 – 9), or allogeneic heart grafts at 4 hrs post injection of <sup>99m</sup>Tc-IgG isotype control (mouse 10 – 14). Data expressed as percentage injected dose per gram of tissue (%ID/g)
